# Supplementary material
Source: publisher site journal article supplement (https://www.dovepress.com/article/330813)
Supplement: Supplementary file 1 [file get_supplementary_file.php]

**Supplementary Materials: Figures**


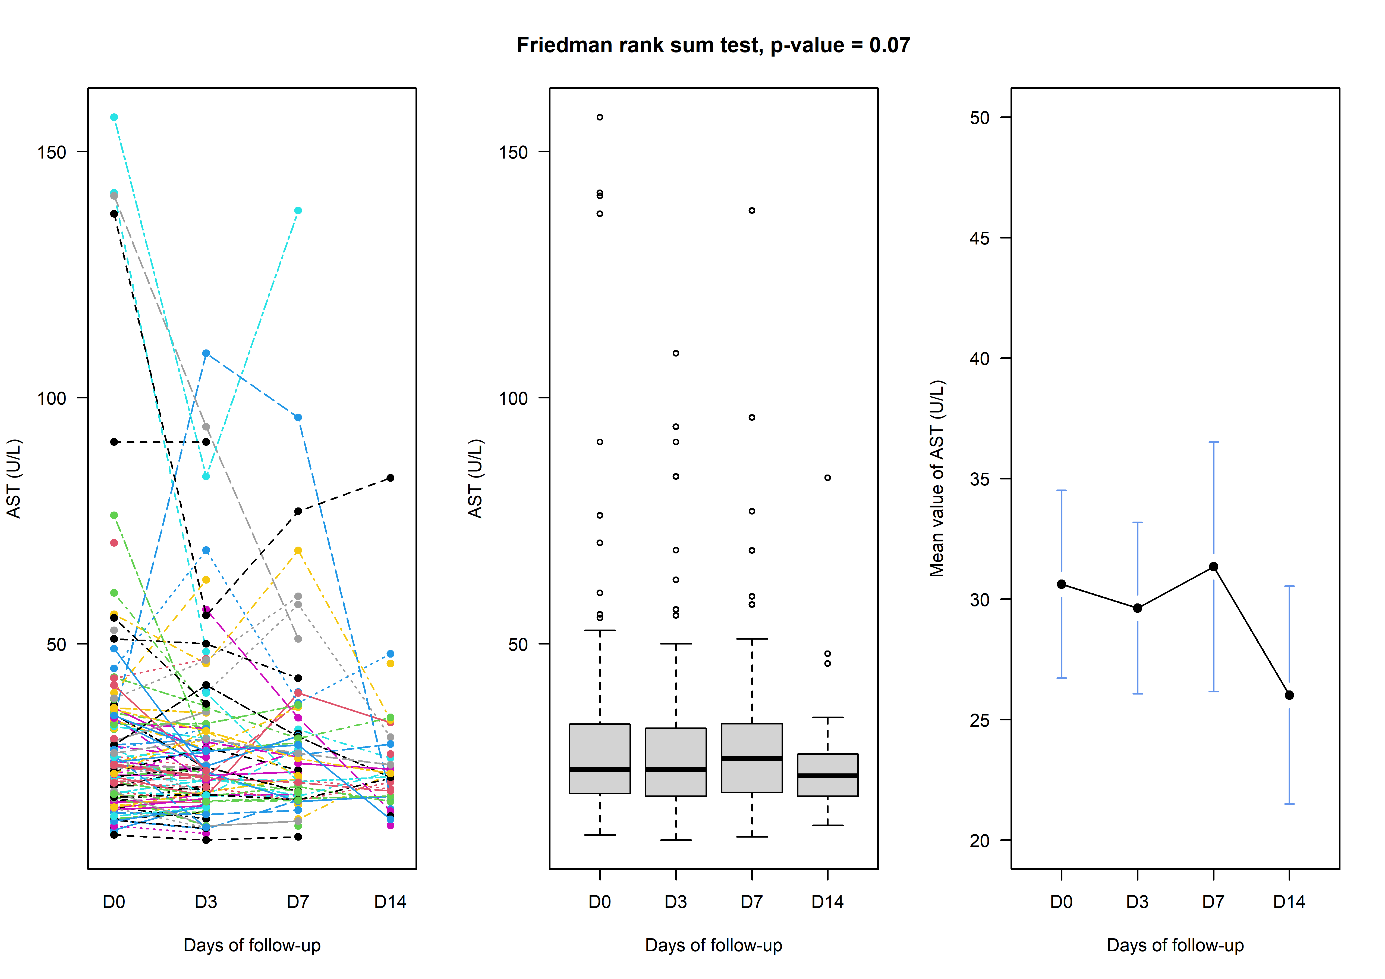


**Figure S1**. Change in aspartate transaminase (AST) values during the scheduled follow-up


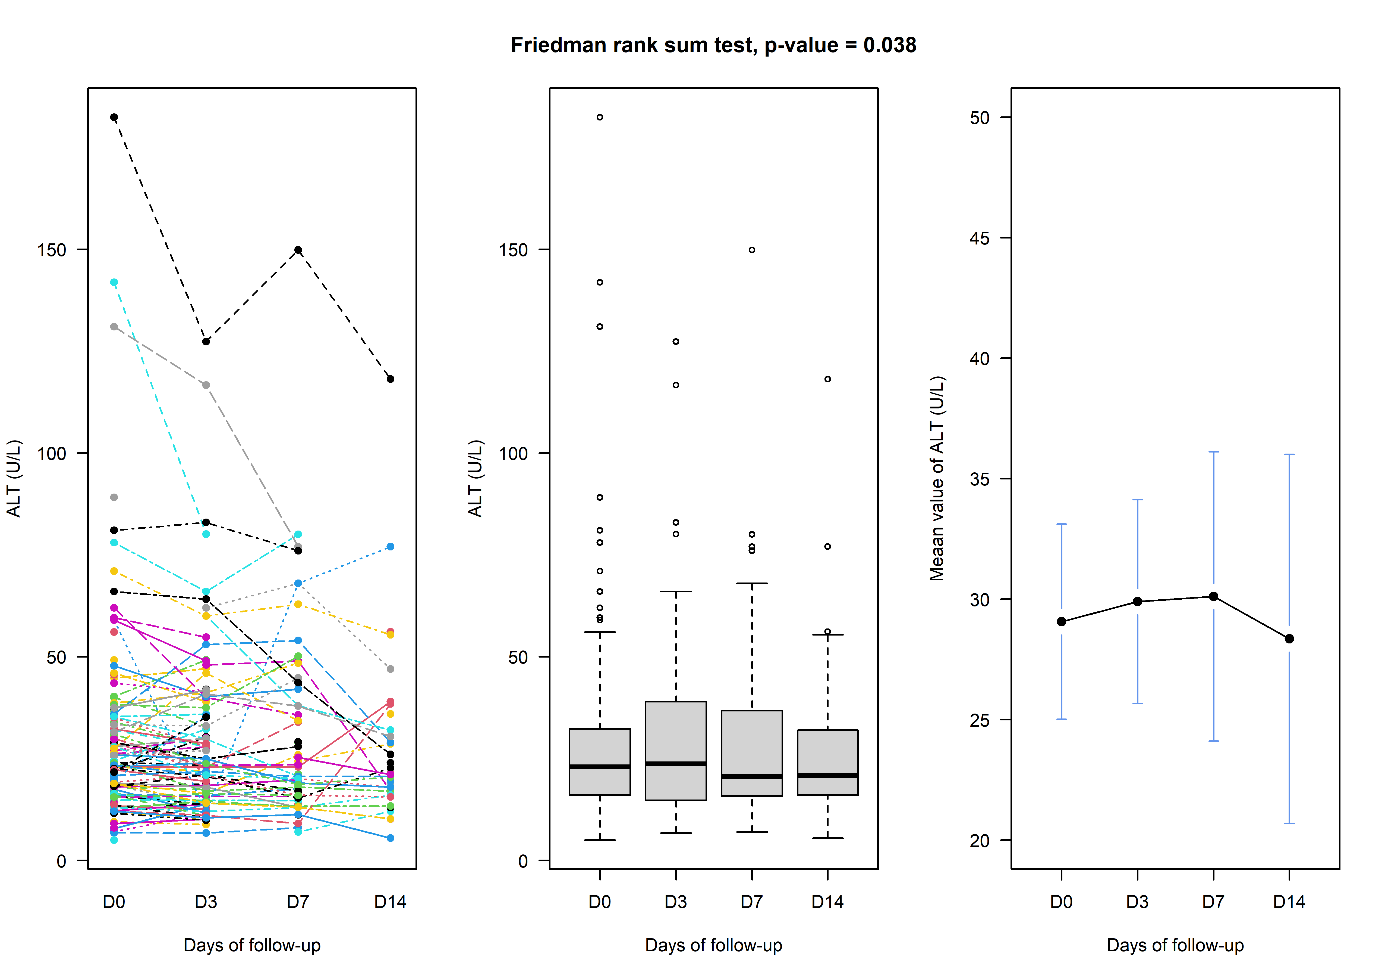


**Figure S2**. Change in alanine transaminase (ALT) values during the scheduled follow-up


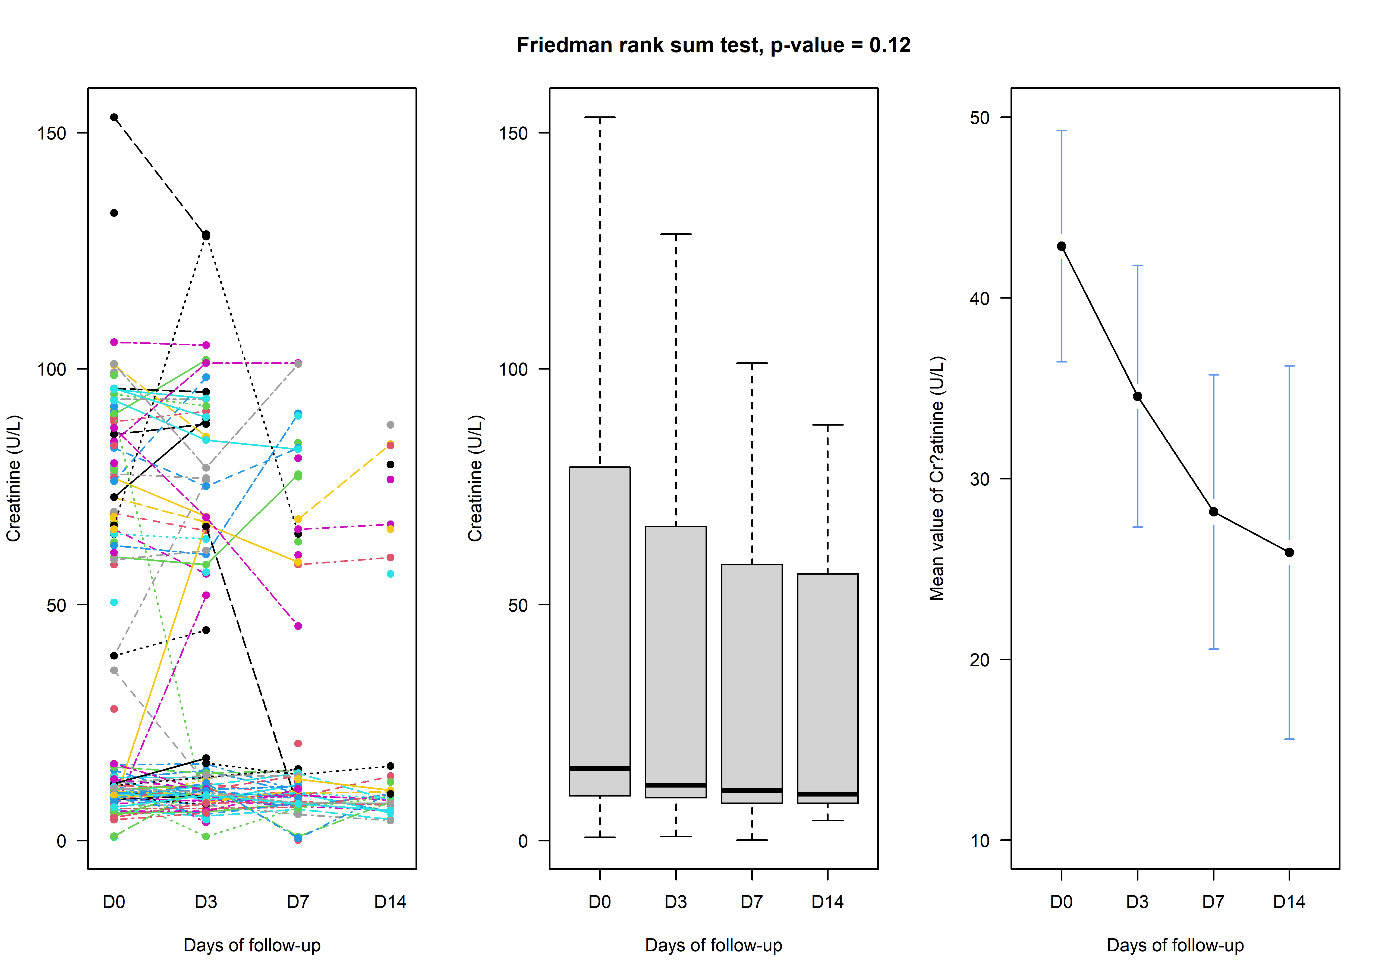


**Figure S3**. Change in Creatinine values during the scheduled follow-up


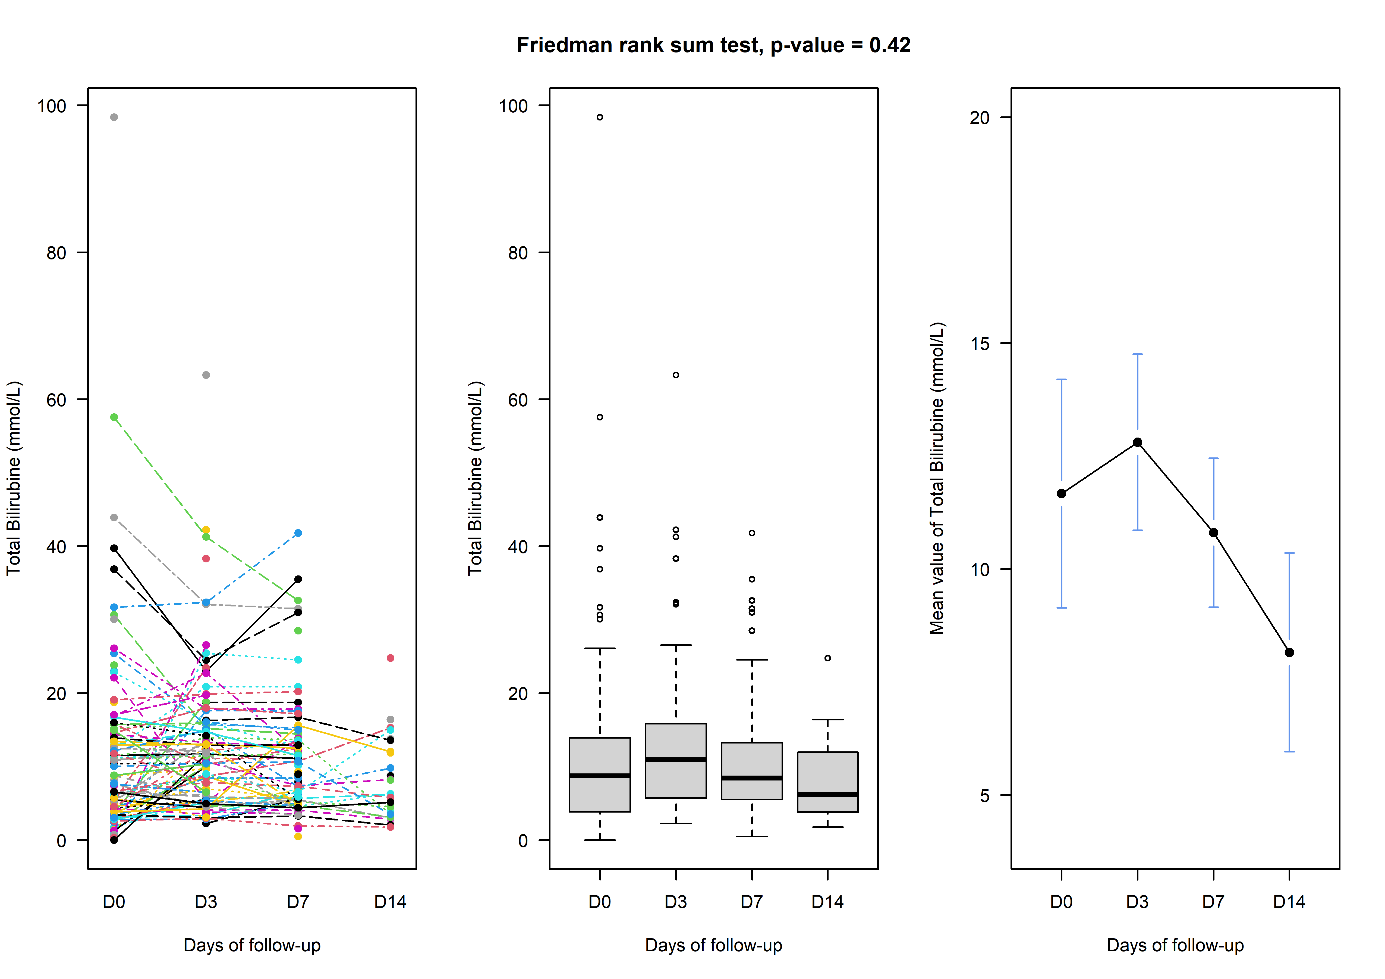


**Figure S4**. Change in Total Bilirubin values during the scheduled follow-up


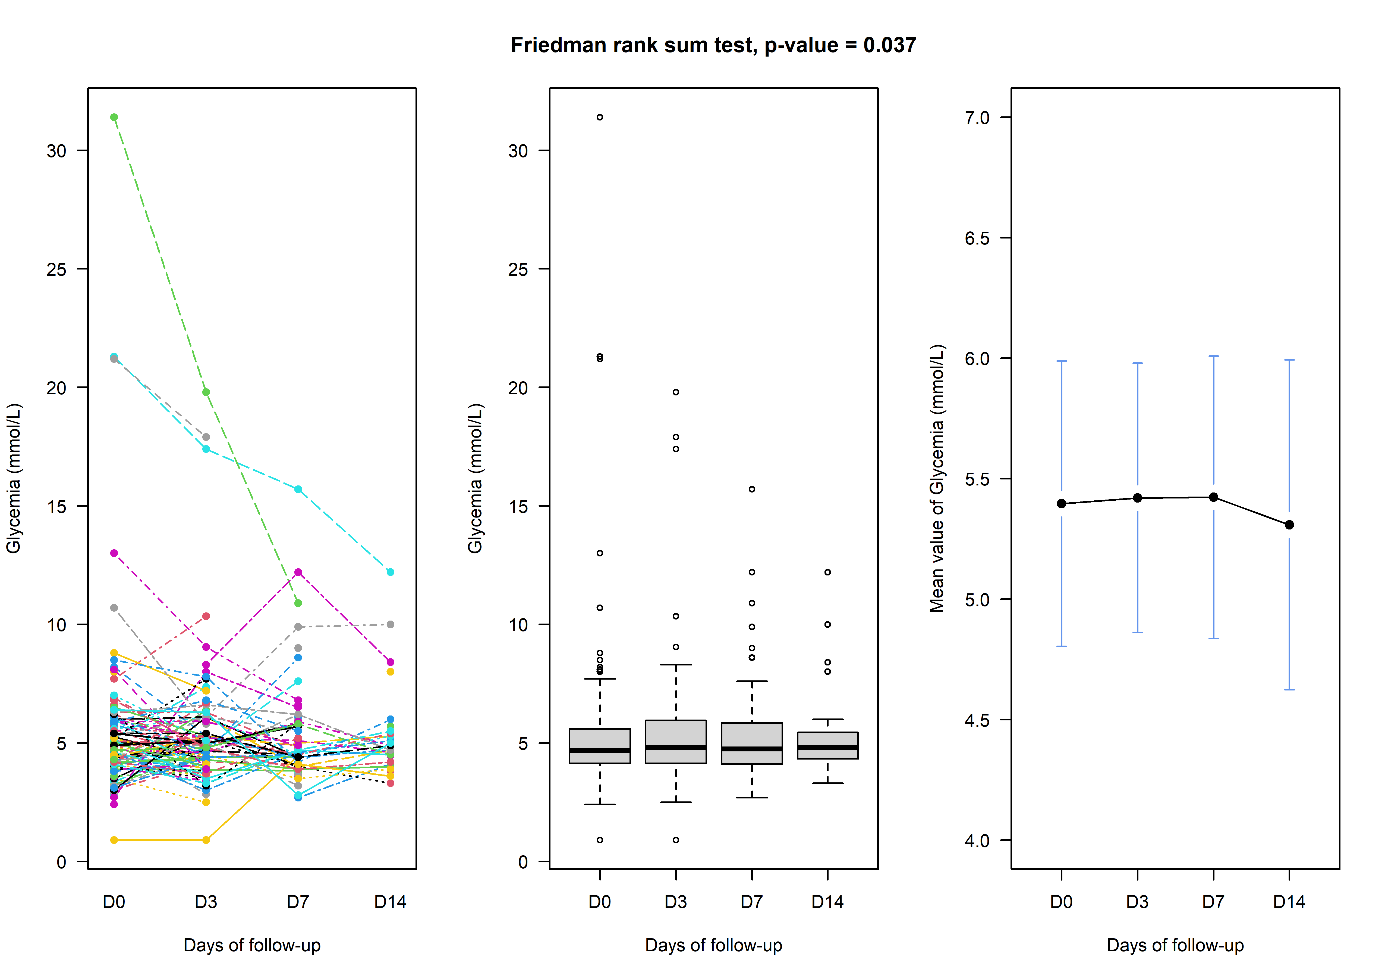


**Figure S5**. Change in blood glucose values during the scheduled follow-up


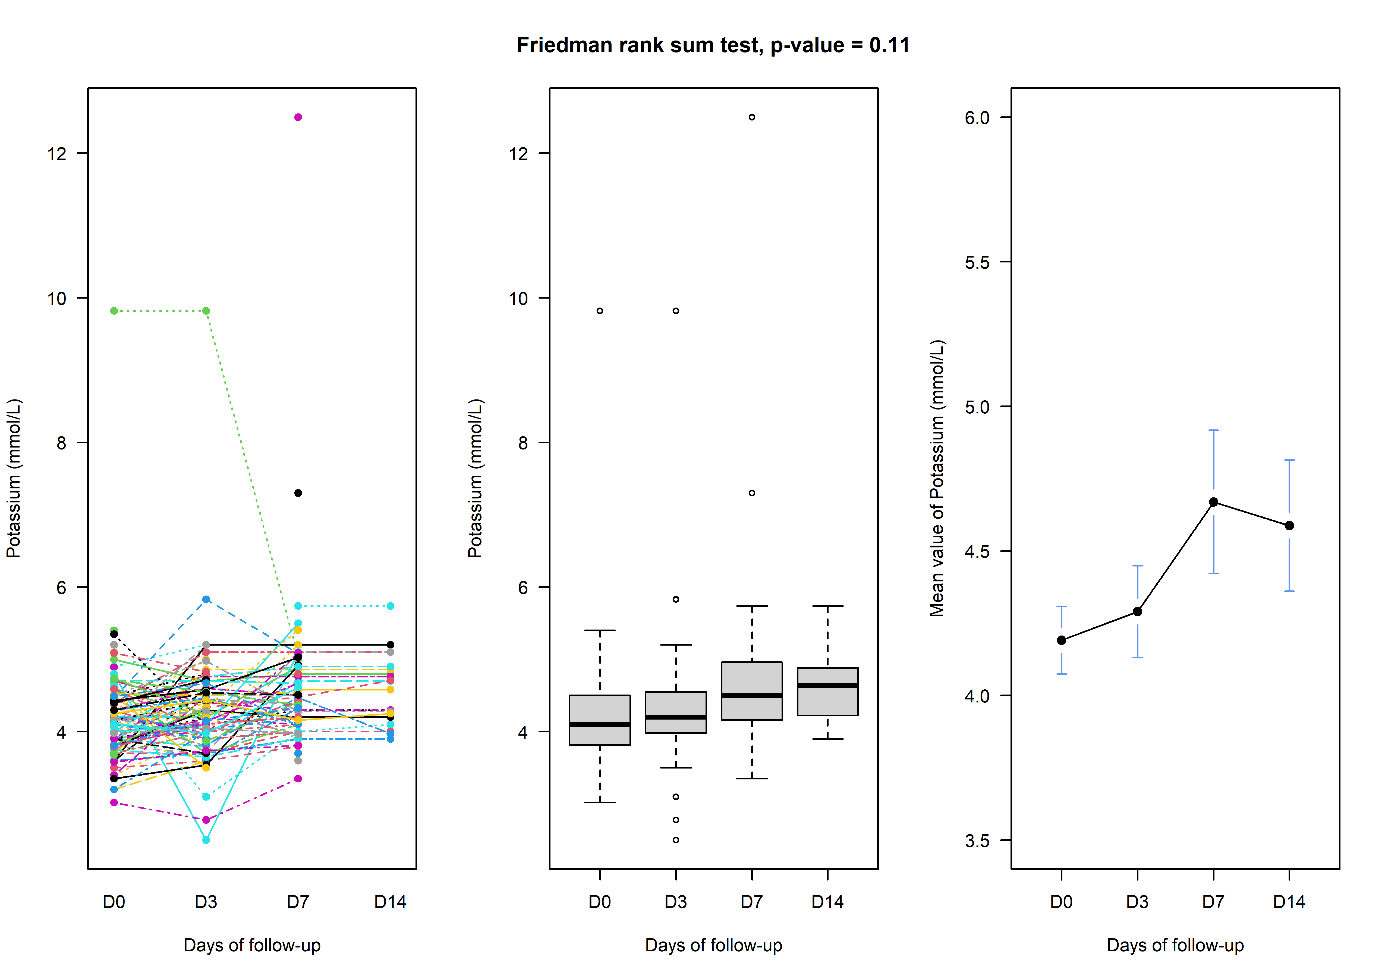


**Figure S6**. Change in Potassium values during the scheduled follow-up


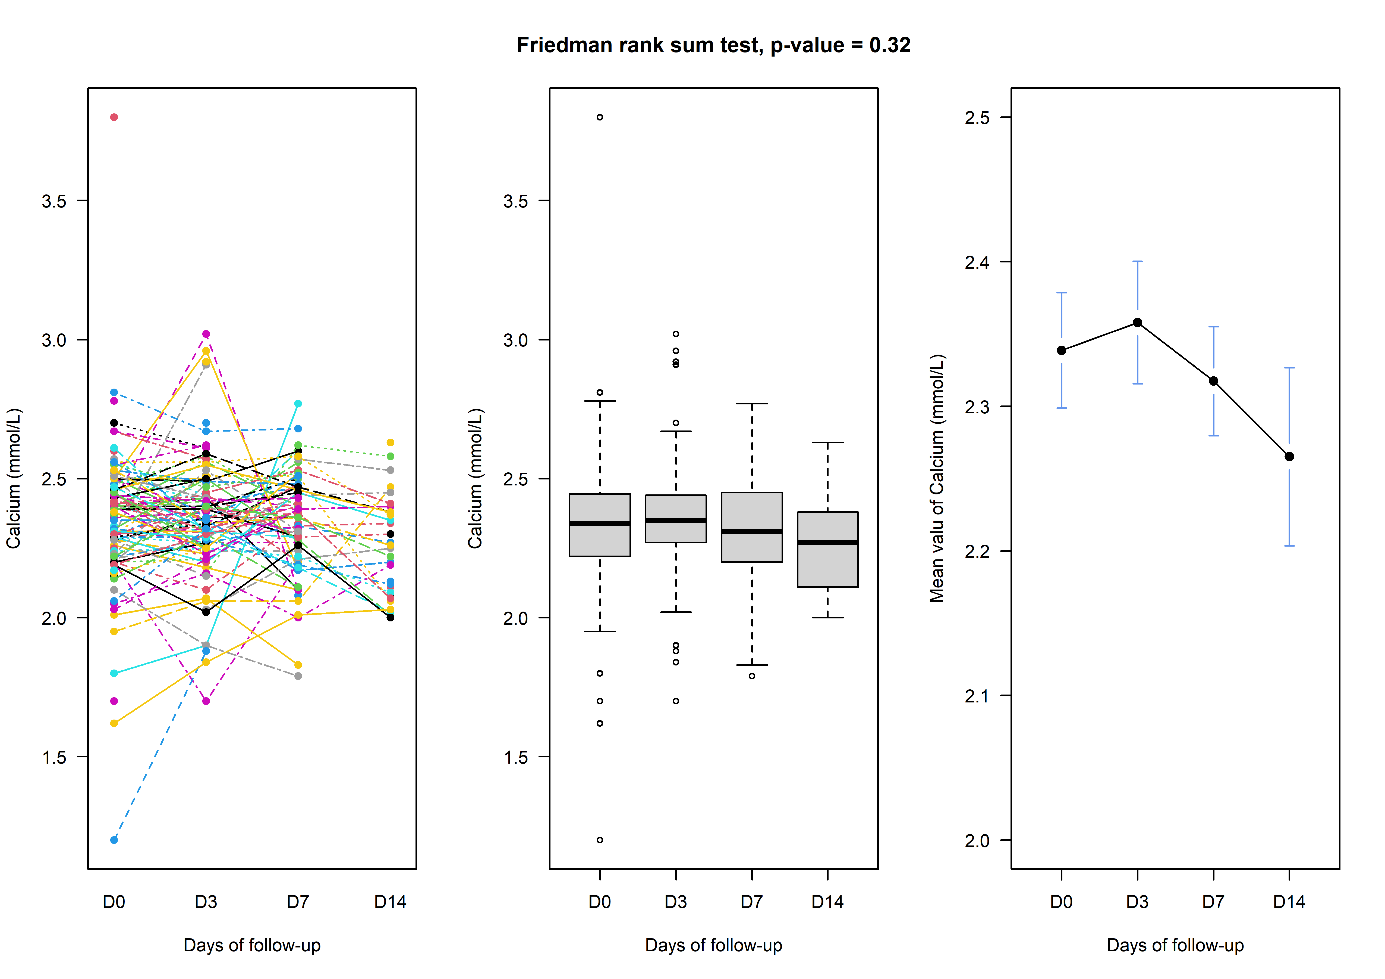


**Figure S7**. Change in Calcium values during the scheduled follow-up


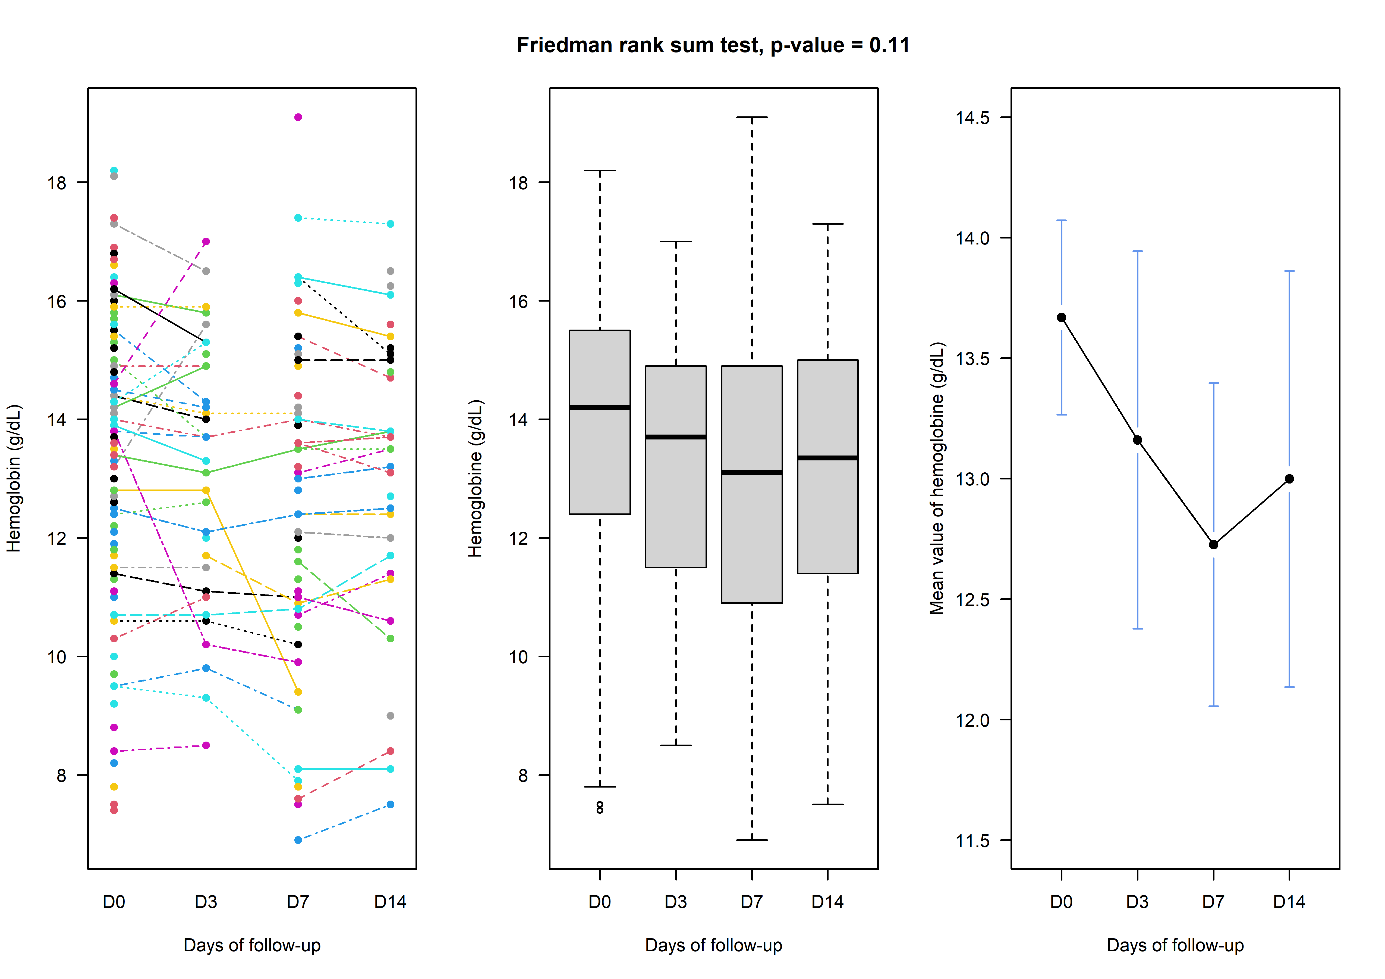


**Figure S8**. Change in hemoglobin level during the scheduled follow-up


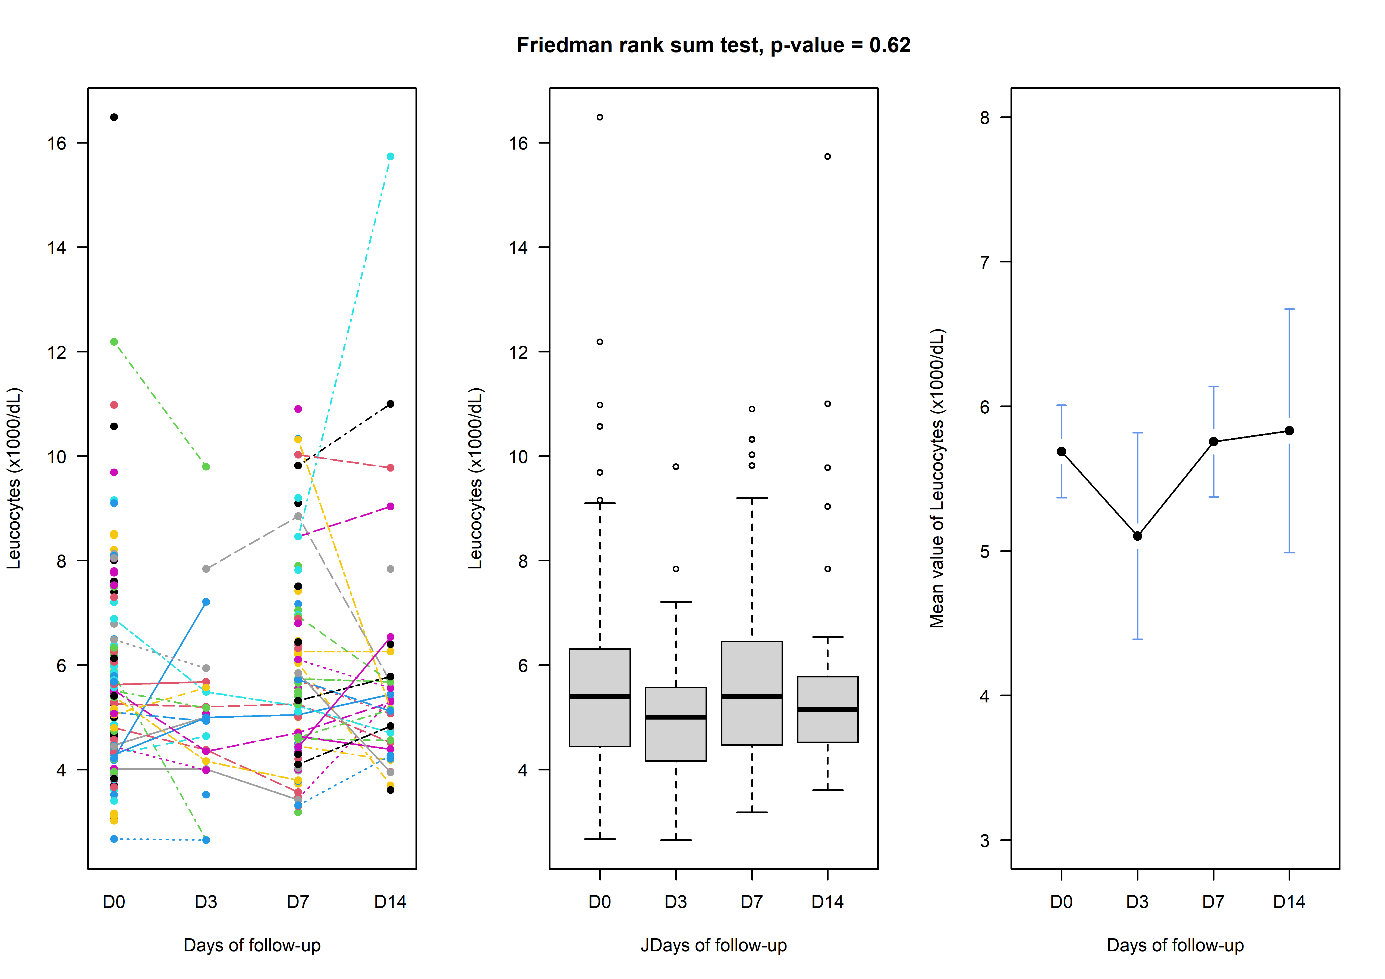


**Figure S9.** Change in white blood cells during the scheduled follow-up


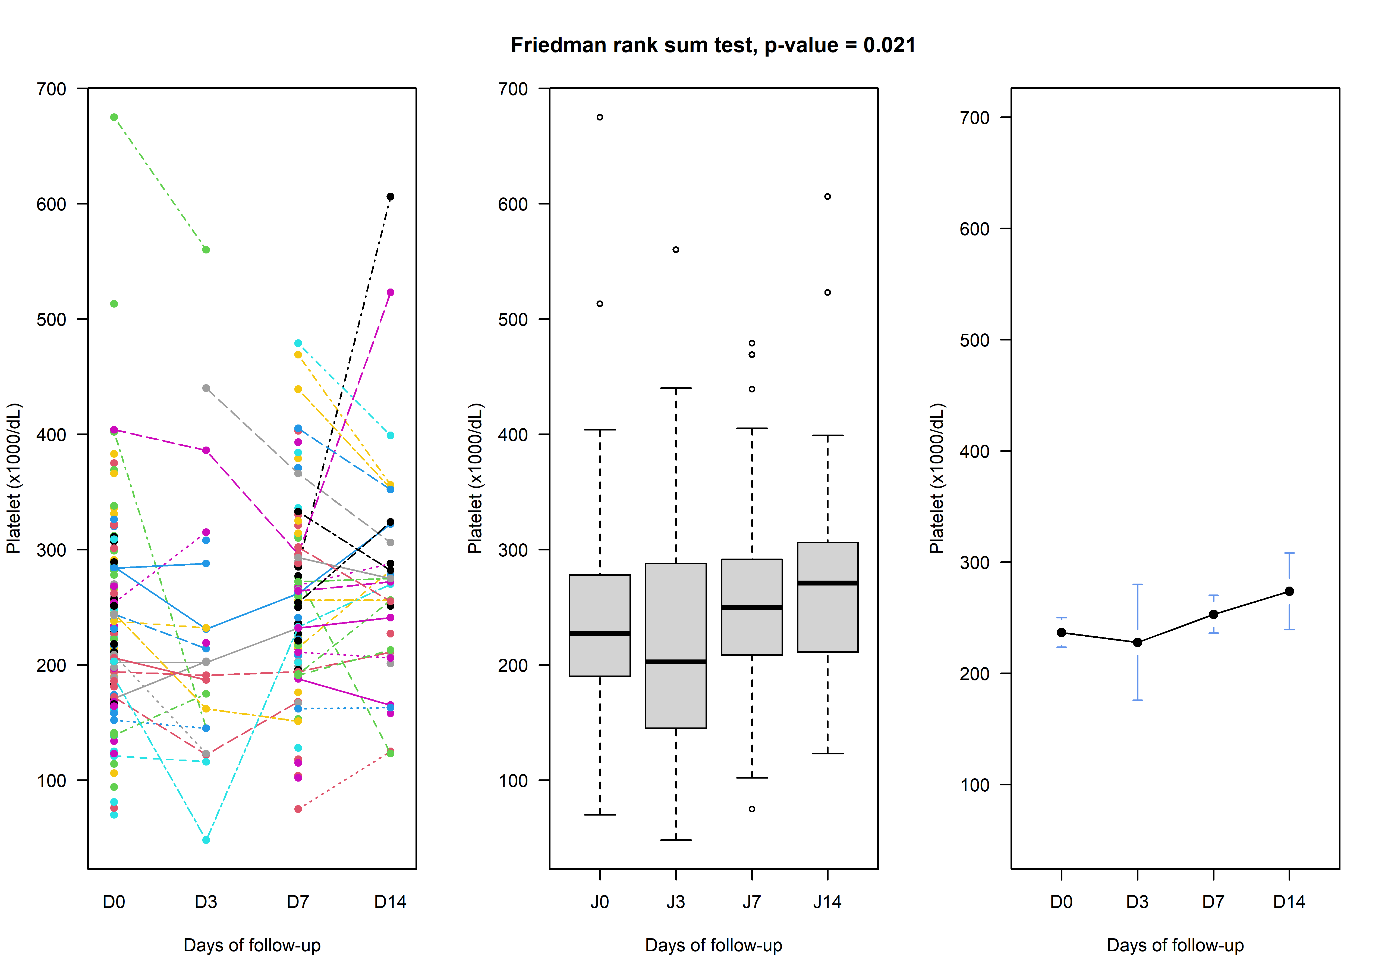


**Figure S10**. Change in platelet during the scheduled follow-up

# Supplementary materials : Tables

**Table S1. Co-medications use by the patients during the follow up**

|  | **Overall**  **n (%)** | **Treatment** | | |
| --- | --- | --- | --- | --- |
| **HCQ + AZ**  **n (%)** | **CQ + AZ**  **n (%)** | **Not treated**  **n (%)** |
| # of medication, | 126 | 115 | 1 | 10 |
| Amlodipine | 19 (15.1) | 17 (14.8) | 0 ( 0.0) | 2 (20.0) |
| Vitamin C | 8 ( 6.3) | 5 ( 4.3) | 1 (100.0) | 2 (20.0) |
| Atenolol | 7 ( 5.6) | 7 ( 6.1) | 0 ( 0.0) | 0 ( 0.0) |
| Insulin | 7 ( 5.6) | 7 ( 6.1) | 0 ( 0.0) | 0 ( 0.0) |
| Complex vitamin | 6 ( 4.8) | 5 ( 4.3) | 0 ( 0.0) | 1 (10.0) |
| Amoxicillin + clavulanic acid | 5 ( 4.0) | 5 ( 4.3) | 0 ( 0.0) | 0 ( 0.0) |
| Paracetamol | 5 ( 4.0) | 5 ( 4.3) | 0 ( 0.0) | 0 ( 0.0) |
| Enoxaparin | 4 ( 3.2) | 4 ( 3.5) | 0 ( 0.0) | 0 ( 0.0) |
| Zinc | 4 ( 3.2) | 4 ( 3.5) | 0 ( 0.0) | 0 ( 0.0) |
| Captopril | 3 ( 2.4) | 3 ( 2.6) | 0 ( 0.0) | 0 ( 0.0) |
| Methyldopa | 3 ( 2.4) | 2 ( 1.7) | 0 ( 0.0) | 1 (10.0) |
| Aspirin | 2 ( 1.6) | 2 ( 1.7) | 0 ( 0.0) | 0 ( 0.0) |
| Furosemide | 2 ( 1.6) | 2 ( 1.7) | 0 ( 0.0) | 0 ( 0.0) |
| Imipenem | 2 ( 1.6) | 2 ( 1.7) | 0 ( 0.0) | 0 ( 0.0) |
| Levofloxacin | 2 ( 1.6) | 2 ( 1.7) | 0 ( 0.0) | 0 ( 0.0) |
| Lysine acetyl salicylate | 2 ( 1.6) | 2 ( 1.7) | 0 ( 0.0) | 0 ( 0.0) |
| Magnesium | 2 ( 1.6) | 2 ( 1.7) | 0 ( 0.0) | 0 ( 0.0) |
| Nifedipine | 2 ( 1.6) | 0 ( 0.0) | 0 ( 0.0) | 2 (20.0) |
| Omeprazole | 2 ( 1.6) | 2 ( 1.7) | 0 ( 0.0) | 0 ( 0.0) |
| Rhze | 2 ( 1.6) | 2 ( 1.7) | 0 ( 0.0) | 0 ( 0.0) |
| Albendazole | 1 ( 0.8) | 1 ( 0.9) | 0 ( 0.0) | 0 ( 0.0) |
| Aluminum hydroxide | 1 ( 0.8) | 0 ( 0.0) | 0 ( 0.0) | 1 (10.0) |
| Amitryptilline | 1 ( 0.8) | 1 ( 0.9) | 0 ( 0.0) | 0 ( 0.0) |
| Artesunate | 1 ( 0.8) | 1 ( 0.9) | 0 ( 0.0) | 0 ( 0.0) |
| Bisoprolol | 1 ( 0.8) | 1 ( 0.9) | 0 ( 0.0) | 0 ( 0.0) |
| Brimonidine timolol | 1 ( 0.8) | 1 ( 0.9) | 0 ( 0.0) | 0 ( 0.0) |
| Calciparin | 1 ( 0.8) | 1 ( 0.9) | 0 ( 0.0) | 0 ( 0.0) |
| Calcium | 1 ( 0.8) | 1 ( 0.9) | 0 ( 0.0) | 0 ( 0.0) |
| Ceftriaxone | 1 ( 0.8) | 1 ( 0.9) | 0 ( 0.0) | 0 ( 0.0) |
| Chlorepheniramine | 1 ( 0.8) | 1 ( 0.9) | 0 ( 0.0) | 0 ( 0.0) |
| Clochicine | 1 ( 0.8) | 1 ( 0.9) | 0 ( 0.0) | 0 ( 0.0) |
| Diosmectite | 1 ( 0.8) | 1 ( 0.9) | 0 ( 0.0) | 0 ( 0.0) |
| Dolutegravir | 1 ( 0.8) | 1 ( 0.9) | 0 ( 0.0) | 0 ( 0.0) |
| Doxylamine | 1 ( 0.8) | 1 ( 0.9) | 0 ( 0.0) | 0 ( 0.0) |
| Gentamycin | 1 ( 0.8) | 1 ( 0.9) | 0 ( 0.0) | 0 ( 0.0) |
| Hydroxychloroquine | 1 ( 0.8) | 1 ( 0.9) | 0 ( 0.0) | 0 ( 0.0) |
| Irbesartan hydrochlorothiazide | 1 ( 0.8) | 1 ( 0.9) | 0 ( 0.0) | 0 ( 0.0) |
| Lamivudine | 1 ( 0.8) | 1 ( 0.9) | 0 ( 0.0) | 0 ( 0.0) |
| Lorazepam | 1 ( 0.8) | 1 ( 0.9) | 0 ( 0.0) | 0 ( 0.0) |
| Metopimazine | 1 ( 0.8) | 1 ( 0.9) | 0 ( 0.0) | 0 ( 0.0) |
| Metronidazole | 1 ( 0.8) | 1 ( 0.9) | 0 ( 0.0) | 0 ( 0.0) |
| Molsidomine | 1 ( 0.8) | 1 ( 0.9) | 0 ( 0.0) | 0 ( 0.0) |
| Morphine | 1 ( 0.8) | 1 ( 0.9) | 0 ( 0.0) | 0 ( 0.0) |
| Nadroparin | 1 ( 0.8) | 1 ( 0.9) | 0 ( 0.0) | 0 ( 0.0) |
| Ofloxocin | 1 ( 0.8) | 1 ( 0.9) | 0 ( 0.0) | 0 ( 0.0) |
| Phluoroglucinol | 1 ( 0.8) | 1 ( 0.9) | 0 ( 0.0) | 0 ( 0.0) |
| Potassium | 1 ( 0.8) | 1 ( 0.9) | 0 ( 0.0) | 0 ( 0.0) |
| Potassium chloride | 1 ( 0.8) | 0 ( 0.0) | 0 ( 0.0) | 1 (10.0) |
| Prazepam | 1 ( 0.8) | 1 ( 0.9) | 0 ( 0.0) | 0 ( 0.0) |
| Prednisolone | 1 ( 0.8) | 1 ( 0.9) | 0 ( 0.0) | 0 ( 0.0) |
| Pregabalin cobalamin | 1 ( 0.8) | 1 ( 0.9) | 0 ( 0.0) | 0 ( 0.0) |
| Red blood cell concentrate | 1 ( 0.8) | 1 ( 0.9) | 0 ( 0.0) | 0 ( 0.0) |
| Sodium bicarbonate | 1 ( 0.8) | 1 ( 0.9) | 0 ( 0.0) | 0 ( 0.0) |
| Tenofovir | 1 ( 0.8) | 1 ( 0.9) | 0 ( 0.0) | 0 ( 0.0) |
| Tenormine | 1 ( 0.8) | 1 ( 0.9) | 0 ( 0.0) | 0 ( 0.0) |
| Trinitrine | 1 ( 0.8) | 1 ( 0.9) | 0 ( 0.0) | 0 ( 0.0) |
| Vogalene | 1 ( 0.8) | 1 ( 0.9) | 0 ( 0.0) | 0 ( 0.0) |

**Table S2.** The distribution of AEs according to their relationship to the study drug

|  | Certain | Probable | Possible | Unlikely | Unrelated |
| --- | --- | --- | --- | --- | --- |
| n | 2 | 8 | 5 | 15 | 11 |
| Anemia | 0 ( 0.0) | 0 ( 0.0) | 0 ( 0.0) | 0 ( 0.0) | 1 ( 9.1) |
| Anorexia | 0 ( 0.0) | 0 ( 0.0) | 0 ( 0.0) | 1 ( 6.7) | 0 ( 0.0) |
| Headache | 0 ( 0.0) | 0 ( 0.0) | 0 ( 0.0) | 3 (20.0) | 0 ( 0.0) |
| Cramp + paresthesia | 0 ( 0.0) | 0 ( 0.0) | 1 (25.0) | 0 ( 0.0) | 0 ( 0.0) |
| Diarrhea | 1 (50.0) | 0 ( 0.0) | 0 ( 0.0) | 3 (20.0) | 0 ( 0.0) |
| Diarrhea + abdominal pain | 0 ( 0.0) | 0 ( 0.0) | 1 (25.0) | 0 ( 0.0) | 0 ( 0.0) |
| Difficulty breathing | 0 ( 0.0) | 0 ( 0.0) | 0 ( 0.0) | 1 ( 6.7) | 0 ( 0.0) |
| Chest pain | 0 ( 0.0) | 1 (12.5) | 0 ( 0.0) | 2 (13.3) | 0 ( 0.0) |
| Dysarthria | 0 ( 0.0) | 0 ( 0.0) | 0 ( 0.0) | 1 ( 6.7) | 0 ( 0.0) |
| Epigastralgia | 0 ( 0.0) | 0 ( 0.0) | 0 ( 0.0) | 1 ( 6.7) | 0 ( 0.0) |
| Skin rash | 0 ( 0.0) | 1 (12.5) | 0 ( 0.0) | 0 ( 0.0) | 0 ( 0.0) |
| Arterial hypertension | 0 ( 0.0) | 0 ( 0.0) | 0 ( 0.0) | 1 ( 6.7) | 2 (18.2) |
| Jaundice | 0 ( 0.0) | 0 ( 0.0) | 0 ( 0.0) | 1 ( 6.7) | 1 ( 9.1) |
| Insomnia | 0 ( 0.0) | 0 ( 0.0) | 1 (20.0) | 0 ( 0.0) | 0 ( 0.0) |
| Renal failure | 0 ( 0.0) | 0 ( 0.0) | 0 ( 0.0) | 0 ( 0.0) | 1 ( 9.1) |
| Septic monoarthritis | 0 ( 0.0) | 0 ( 0.0) | 0 ( 0.0) | 0 ( 0.0) | 1 ( 9.1) |
| Palpitations | 0 ( 0.0) | 2 (25.0) | 0 ( 0.0) | 0 ( 0.0) | 0 ( 0.0) |
| Simple malaria | 0 ( 0.0) | 0 ( 0.0) | 0 ( 0.0) | 0 ( 0.0) | 1 ( 9.1) |
| Pleurisy | 0 ( 0.0) | 0 ( 0.0) | 0 ( 0.0) | 0 ( 0.0) | 1 ( 9.1) |
| Respiratory disease | 0 ( 0.0) | 0 ( 0.0) | 0 ( 0.0) | 0 ( 0.0) | 1 ( 9.1) |
| Pruritus | 1 (50.0) | 4 (50.0) | 0 ( 0.0) | 0 ( 0.0) | 0 ( 0.0) |
| Somnolence | 0 ( 0.0) | 0 ( 0.0) | 1 (25.0) | 0 ( 0.0) | 0 ( 0.0) |
| Infectious syndrome | 0 ( 0.0) | 0 ( 0.0) | 0 ( 0.0) | 0 ( 0.0) | 1 ( 9.1) |
| Tachycardia | 0 ( 0.0) | 0 ( 0.0) | 0 ( 0.0) | 0 ( 0.0) | 1 ( 9.1) |
| Cough | 0 ( 0.0) | 0 ( 0.0) | 0 ( 0.0) | 1 ( 6.7) | 0 ( 0.0) |
| Vomiting | 0 ( 0.0) | 0 ( 0.0) | 1 (25.0) | 0 ( 0.0) | 0 ( 0.0) |
